# Supplementary material
Source: bioRxiv or medRxiv preprint supplement (https://www.biorxiv.org/content/biorxiv/early/2021/05/08/2021.05.07.443164.1/DC5/embed/media-5.pdf)
Supplement: Supplementary file [file media-5.pdf]

## SUPPLEMENTAL TABLES

**Table S5.** Antibodies used for confocal imaging

| <b>Antibody</b>                 | <b>Supplier</b>          | <b>Catalog #</b> | <b>species</b> | <b>Antibody dilution</b> |
|---------------------------------|--------------------------|------------------|----------------|--------------------------|
| CK-8                            | Millipore                | MABT329          | rat            | 1:100                    |
| p63                             | Abcam                    | ab124762         | rabbit         | 1:100                    |
| Mucin 5AC                       | Labvision Neomarkers     | MS-145-P1        | mouse          | 1:200                    |
| Mucin 5AC                       | Abcam                    | 218363           | rabbit         | 1:200                    |
| CC16                            | Hycult Biotech           | HM2178           | mouse          | 1:50                     |
| Acetylated<br>$\alpha$ -Tubulin | Sigma Aldrich            | T6793            | mouse          | 1:200                    |
| CD144                           | Thermo Fisher Scientific | 14-1449-82       | mouse          | 1:200                    |
